# Supplementary material
Source: PubMed Central journal article supplement (PMC4882105)
Supplement: NIHMS301040-supplement-01.pdf [file NIHMS301040-supplement-01.pdf]

Supplementary Table S1; Slinin et al, AJKD, "Prehemodialysis Care by Dietitians and First-Year Mortality After Initiation of Hemodialysis"

| Demographic Covariates                                   | Interactions/Higher Order Terms                             |
|----------------------------------------------------------|-------------------------------------------------------------|
| Age                                                      | Erythropoietin use * predialysis nephrology care            |
| Race                                                     | Atherosclerotic heart disease * peripheral vascular disease |
| Sex                                                      | Peripheral vascular disease * erythropoietin use            |
| Medical coverage at dialysis initiation                  | Cause of ESRD * medical coverage                            |
| Causes of ESRD                                           | Hemoglobin * vascular access at initiation                  |
| Diabetes                                                 | Race * female sex                                           |
| Hypertension                                             | Peripheral vascular disease * hypertension                  |
| Glomerulonephritis                                       | Race * medical coverage                                     |
| Other                                                    | Cause of ESRD * diabetes                                    |
| Comorbid Conditions                                      | Atherosclerotic heart disease * erythropoietin use          |
| Diabetes                                                 | Nephrology care * medical coverage                          |
| Hypertension                                             | Peripheral vascular disease * vascular access at initiation |
| Peripheral vascular disease                              | Hypertension * smoking                                      |
| Atherosclerotic heart disease                            | Female sex * medical coverage                               |
| Chronic obstructive pulmonary disease                    | Hypertension * nephrology care                              |
| Cancer                                                   | Hemoglobin * medical coverage                               |
| Smoking                                                  | Race * assistance with activities of daily living           |
| Inability to ambulate                                    | Inability to transfer * medical coverage                    |
| Inability to transfer                                    | Race * atherosclerotic heart disease                        |
| Health care                                              | Cause of ESRD * peripheral vascular disease                 |
| Predialysis nephrology care                              | Diabetes * medical coverage                                 |
| Predialysis erythropoietin use                           | Hypertension * cancer                                       |
| Vascular access at initiation (fistula, graft, catheter) | Cancer * hemoglobin                                         |
| Laboratory parameters                                    | Race * vascular access at initiation                        |
| Hemoglobin                                               | Peripheral vascular disease * hemoglobin                    |
| Estimated glomerular filtration rate                     | COPD * predialysis nephrology care                          |

COPD, chronic obstructive pulmonary disease; ESRD, end-stage renal disease.
