# Supplementary material
Source: PubMed Central journal article supplement (PMC4882105)
Supplement: NIHMS301040-supplement-02.pdf [file NIHMS301040-supplement-02.pdf]

Table S2. Baseline Patient Characteristics by Dietitian Care Status

| Baseline Characteristics                     | Total        | Dietitian Care |             |             | P       |
|----------------------------------------------|--------------|----------------|-------------|-------------|---------|
|                                              |              | None           | 0-12 months | > 12 months |         |
| <i>n</i>                                     | 156,440      | 138,200        | 13,327      | 4913        |         |
| Age, mean ± SD                               | 63.4 ± 15.2  | 63.3 ± 15.2    | 63.7 ± 14.5 | 64.2 ± 14.2 | < 0.001 |
| Sex, <i>n</i> (%)                            |              |                |             |             | < 0.001 |
| Men                                          | 87,164 (56)  | 76,515 (55)    | 7703 (58)   | 2946 (60)   |         |
| Women                                        | 69,276 (44)  | 61,685(45)     | 5624(42)    | 1967(40)    |         |
| Race, <i>n</i> (%)                           |              |                |             |             | < 0.001 |
| White                                        | 102,187 (65) | 89,842 (65)    | 9002 (68)   | 3343 (68)   |         |
| African American                             | 46,501 (30)  | 41,827 (30)    | 3426 (26)   | 1248 (25)   |         |
| Asian                                        | 5819 (3.7)   | 4,866 (3.5)    | 727 (5.5)   | 226 (4.6)   |         |
| Native American                              | 1723 (1.1)   | 1480 (1.1)     | 154 (1.2)   | 89 (1.8)    |         |
| Other                                        | 210 (0.1)    | 185 (0.1)      | 18 (0.1)    | 7 (0.1)     |         |
| Cause of ESRD, <i>n</i> (%)                  |              |                |             |             | < 0.001 |
| Diabetes                                     | 72,513 (46)  | 63,214 (46)    | 6864 (52)   | 2435 (50)   |         |
| Hypertension                                 | 43,485 (28)  | 38,969 (28)    | 3323 (25)   | 1193 (24)   |         |
| Glomerulonephritis                           | 10,457 (7)   | 9020 (6.5)     | 959 (7.2)   | 478 (10)    |         |
| Other                                        | 29,985 (19)  | 26,997 (19.5)  | 2181 (16)   | 807 (16)    |         |
| Comorbid conditions, <i>n</i> (%)            |              |                |             |             |         |
| ASHD                                         | 37,868 (24)  | 32,573 (24)    | 3818 (29)   | 1477 (30)   | < 0.001 |
| CHF                                          | 56,543 (36)  | 49,908 (36)    | 4941 (37)   | 1694 (35)   | 0.004   |
| PVD                                          | 24,883 (16)  | 21,393 (16)    | 2559 (19)   | 931 (19)    | < 0.001 |
| CVA/TIA                                      | 16,411 (11)  | 14,433 (10)    | 1430 (11)   | 548 (11)    | 0.2     |
| Diabetes                                     | 83,431 (53)  | 73,189 (53)    | 7481 (56)   | 2761 (56)   | < 0.001 |
| Hypertension                                 | 132,041 (84) | 116,424 (84)   | 11,259 (85) | 4358(89)    | < 0.001 |
| COPD                                         | 15,003 (10)  | 13,424 (10)    | 1132 (9)    | 447 (9)     | < 0.001 |
| Cancer                                       | 12,264 (8)   | 10,960 (8)     | 925 (7)     | 379 (8)     | 0.002   |
| Functional status, <i>n</i> (%)              |              |                |             |             |         |
| Unable to ambulate                           | 11,690 (7.5) | 10,645 (8)     | 791 (6)     | 254 (5)     | < 0.001 |
| Unable to transfer                           | 5392 (3.5)   | 4944 (3.6)     | 351 (2.6)   | 97 (2)      | < 0.001 |
| Needs help with ADL                          | 18,157 (12)  | 16,484 (12)    | 1252 (9)    | 421 (9)     | < 0.001 |
| Institutionalized                            | 12,158 (8)   | 11,110 (8)     | 808 (6)     | 240 (5)     | < 0.001 |
| Employed                                     | 15,224 (10)  | 13,820 (10)    | 1431 (11)   | 617 (13)    | < 0.001 |
| Alcohol use, <i>n</i> (%)                    | 2607 (1.7)   | 2422 (1.8)     | 140 (1.1)   | 45 (1)      | < 0.001 |
| Smoking, <i>n</i> (%)                        | 10,340 (7)   | 9384 (7)       | 686 (5)     | 270 (6)     | < 0.001 |
| Drug use, <i>n</i> (%)                       | 2501 (1.6)   | 2310 (1.7)     | 155 (1.2)   | 36 (0.7)    | < 0.001 |
| BMI, kg/m <sup>2</sup> , mean ± SD           | 28.6 ± 7.7   | 28.6 ± 7.7     | 28.7 ± 7.6  | 29.0 ± 7.4  | < 0.001 |
| Hemoglobin, g/dL, mean ± SD                  | 10.1 ± 1.7   | 10.0 ± 1.7     | 10.4 ± 1.7  | 10.5 ± 1.7  | < 0.001 |
| Hemoglobin > 11g/dL, <i>n</i> (%)            | 40,666 (26)  | 34,633 (25)    | 4288 (32)   | 1745 (36)   | < 0.001 |
| Albumin, g/dL, mean ± SD                     | 3.6 ± 0.7    | 3.6 ± 0.7      | 3.8 ± 0.7   | 3.9 ± 0.7   | < 0.001 |
| Albumin ≥ 4.0 g/dL, <i>n</i> (%)             | 14,628 (9)   | 12,162 (9)     | 1,652 (12)  | 814 (17)    | < 0.001 |
| eGFR, mL/min/1.73 m <sup>2</sup> , mean ± SD | 10.4 ± 4.8   | 10.4 ± 4.9     | 10.8 ± 4.7  | 10.3 ± 4.3  | < 0.001 |
| Erythropoietin use, <i>n</i> (%)             | 49,845 (32)  | 37,477 (27)    | 8919 (67)   | 3449 (70)   | < 0.001 |
| Nephrology care, <i>n</i> (%)                |              |                |             |             | < 0.001 |
| None                                         | 60,634 (39)  | 60,460 (44)    | 148 (1.7)   | 26 (0.5)    |         |
| 6-12 months                                  | 55,839 (36)  | 45,260 (33)    | 10,447 (78) | 132 (2.7)   |         |
| > 12 months                                  | 36,645 (23)  | 29,208 (21)    | 2689 (20)   | 4748 (97)   |         |
| Unknown                                      | 3321 (2.1)   | 3271 (2.4)     | 43 (0.3)    | 7 (0.1)     |         |

Supplementary Table S2; Slinin et al, AJKD, "Prehemodialysis Care by Dietitians and First-Year Mortality After Initiation of Hemodialysis"

|                                             |              |              |           |           |         |
|---------------------------------------------|--------------|--------------|-----------|-----------|---------|
| Vascular access at initiation, <i>n</i> (%) |              |              |           |           | < 0.001 |
| Arteriovenous fistula                       | 21,150 (14)  | 16,046 (12)  | 3351 (25) | 1753 (36) |         |
| Arteriovenous graft                         | 7120 (5)     | 5868 (4)     | 833 (6)   | 419 (9)   |         |
| Catheter                                    | 127,158 (81) | 115,475 (84) | 8972 (67) | 2711 (55) |         |
| Other                                       | 949 (0.6)    | 765 (0.6)    | 161 (1.2) | 23 (0.5)  |         |
| Medical coverage initiation, <i>n</i> (%)   |              |              |           |           | < 0.001 |
| Private                                     | 39,673 (25)  | 34,560 (25)  | 3641 (27) | 1472 (30) |         |
| Medicare only                               | 28,847 (18)  | 25,705 (19)  | 2320 (17) | 822 (17)  |         |
| Medicaid only                               | 17,547 (11)  | 15,900 (12)  | 1315 (10) | 332 (7)   |         |
| Medicare and Medicaid                       | 20,421 (13)  | 18,349 (13)  | 1539 (12) | 533 (11)  |         |
| VA                                          | 1406 (1)     | 961 (0.7)    | 282 (2)   | 163 (3)   |         |
| Other                                       | 36,332 (23)  | 31,513 (23)  | 3468 (26) | 1351 (28) |         |
| None                                        | 12,214 (8)   | 11,212 (8)   | 762 (6)   | 240 (5)   |         |

ADL, activities of daily living; ASHD, atherosclerotic heart disease; BMI, body mass index; CHF congestive heart failure; COPD, chronic obstructive pulmonary disease; CVA/TIA, cerebrovascular accident/transient ischemic attack; eGFR, estimated glomerular filtration rate; ESRD, end-stage renal disease; SD, standard deviation; VA, Veterans Administration.

Note: Conversion factors for units: albumin in g/dL to g/L, x10; eGFR in mL/min to mL/s, x0.01667; hemoglobin in g/dL to g/L, x10.

\*Albumin measured by bromocresol purple dye-binding assay was converted to albumin measured by bromocresol green dye-binding assay by the following formula:  $Alb_{BCG} = 0.55 + Alb_{BCP}$ .
