# Supplementary material
Source: PubMed Central journal article supplement (PMC4882105)
Supplement: NIHMS301040-supplement-03.pdf [file NIHMS301040-supplement-03.pdf]

Table S3. Dietitian Care Before Dialysis Initiation and Risk of Death in First Year on Dialysis

| Variables                             | Unadjusted       |         | Multivariable Model                        |         |                                        |    |
|---------------------------------------|------------------|---------|--------------------------------------------|---------|----------------------------------------|----|
|                                       | HR (95% CI)      | P       | Not Including Nephrology Care <sup>‡</sup> |         | Including Nephrology Care <sup>†</sup> |    |
|                                       | HR (95% CI)      | P       | HR (95% CI)                                | P       | HR (95% CI)                            | P  |
| Total cohort                          | n = 156,440      |         | n = 154,155                                |         | n = 154,155                            |    |
| Dietitian care                        |                  |         |                                            |         |                                        |    |
| None                                  | Reference        |         | Reference                                  |         | Reference                              |    |
| 0-12 months                           | 0.94 (0.90-0.98) | 0.002   | 0.95 (0.91-0.99)                           | 0.01    | 0.99 (0.95-1.03)                       | NS |
| > 12 months                           | 0.89 (0.83-0.96) | 0.002   | 0.85 (0.79-0.91)                           | < 0.001 | 0.96 (0.90-1.04)                       | NS |
| Patients who received nephrology care | n = 92,484       |         | n = 91,509                                 |         |                                        |    |
| Dietitian Care                        |                  |         |                                            |         |                                        |    |
| None                                  | Reference        |         | Reference                                  |         |                                        |    |
| 0-12 months                           | 0.98 (0.94-1.02) | NS      | 1.01 (0.97-1.06)                           | NS      |                                        |    |
| > 12 months                           | 0.78 (0.72-0.83) | < 0.001 | 0.91 (0.85-0.98)                           | 0.01    |                                        |    |

CI, confidence interval; HR, hazard ratio.

<sup>‡</sup>Cox proportional hazards model adjusted for age, sex, race, smoking, alcohol use, drug dependence, cause of end-stage renal disease, functional status (inability to ambulate or transfer, assistance with activities of daily living, institutionalization, employment at the time of end-stage renal disease onset), comorbid conditions (history of atherosclerotic heart disease, congestive heart failure, cerebrovascular accident, peripheral vascular disease, hypertension, diabetes, chronic obstructive pulmonary disease, cancer), and hemoglobin at dialysis initiation, vascular access at dialysis initiation, pre-dialysis erythropoietin use, insurance at the time of dialysis initiation.

<sup>†</sup>Cox proportional hazards models adjusted for above factors and predialysis nephrology care.
